# Supplementary material for: Monitoring and quantifying CO 2 emissions of isolated power plants from space
Source: Copernicus journal article supplement (doi:10.5194/acp-23-6599-2023), 2023-06-15
Supplement: Supplementary file 1 [file acp-23-6599-2023-supplement.zip]

Archive with 3 entries (3 files):
- Table S2-The detected global power plants with average estimated emissions.xlsx
- Supplement-Monitoring and quantifying CO2 emissions of isolated power plants from space.pdf
- acp-23-6599-2023-supplement-title-page.pdf
