# Supplementary material for: Monitoring and quantifying CO 2 emissions of isolated power plants from space
Source: Copernicus journal article supplement (doi:10.5194/acp-23-6599-2023), 2023-06-15
Supplement: Supplementary file 1 [file acp-23-6599-2023-supplement.zip › acp-23-6599-2023-supplement-title-page.pdf]

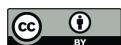

*Supplement of*

**Monitoring and quantifying CO<sub>2</sub> emissions of isolated power plants from space**

**Xiaojuan Lin et al.**

*Correspondence to:* Zhu Liu (zhuliu@tsinghua.edu.cn)

- acp-23-6599-2023-supplement-title-page.pdf
- Supplement-Monitoring and quantifying CO<sub>2</sub> emissions of isolated power plants from space.pdf
- Table S2-The detected global power plants with average estimated emissions.xlsx

The copyright of individual parts of the supplement might differ from the article licence.
