# Supplementary material for: Monitoring and quantifying CO 2 emissions of isolated power plants from space
Source: Copernicus journal article supplement (doi:10.5194/acp-23-6599-2023), 2023-06-15
Supplement: Supplementary file 1 [file acp-23-6599-2023-supplement.zip › Table S2-The detected global power plants with average estimated emissions.xlsx]

## Sheet: Sheet1
Table S2 The detected global power plants with average estimated emissions
Name	Estimated emission (kt/d)	Uncertainty of background (kt/d)	Uncertainty of XCO2 (kt/d)	Uncertainty of wind (kt/d)	Total uncertainty (kt/d)	Number of observations
ARE_Jebel Ali D, E, G, K, L, M _Gas	42	0.8	1.9	8.2	10.8	1
ARE_Shuweihat S1_Gas	52.4	1.8	0.3	14.1	16.2	1
AUS_Loy Yang A, B, Valley_CoalGas	53.4	2.5	2.6	10.2	15.3	1
AUS_Tarong, North_CoalOil	27.1	1.1	0.4	6.1	7.6	2
CHN_CPI Shanxi Houma power station_Coal	25.1	1.6	0.5	26	28.1	2
CHN_Datang Shentou power station_Coal	25.4	1.4	0.4	5.6	7.4	2
CHN_Datang Tuoketuo,9-10 power station_Coal	87.2	5	1.4	14.9	21.3	3
CHN_East Hope Metals Wucaiwan power station_Coal	44	1.9	0.4	25.1	27.3	3
CHN_Fengzhen - Huaneng, Jinlong Coal_Coal	36.7	1.8	0.6	9.2	11.6	1
CHN_Guodian Dawukou power station_Coal	43.8	1.6	25.9	35	62.6	1
CHN_Huadian Xinzhou Guangyu power station_Coal	32.2	1.2	0.3	41.1	42.6	1
CHN_Huadian Xisaishan power station_Coal	50.1	2.1	0.2	11	13.3	1
CHN_Huaneng Shangdu power station_Coal	45.7	1.9	0.3	1.6	3.8	1
CHN_Jiaxing power station_Coal	69.4	3.6	0.6	6.3	10.4	1
CHN_Laibin power station_Coal	16	1.2	0.4	3.7	5.2	1
CHN_Linyi Huasheng power station_Coal	16.8	0.7	0.6	10.6	11.9	1
CHN_Ningdong Younglight power station_Coal	71.1	2.6	0.3	16.7	19.7	3
CHN_Ninghai power station_Coal	36.7	2	0.2	4.2	6.5	1
CHN_Ordos Power Qipanjing power station_Coal	49.9	1.4	1	5.3	7.6	1
CHN_Sanhe Yanjiao power station_Coal	26.4	1.5	0.2	3.4	5.1	1
CHN_SDIC Dananhu power station_Coal	11	0.5	0.2	2	2.7	1
CHN_Shenhua Guoneng Hami power station_Coal	11.9	0.3	0	4.9	5.3	2
CHN_Shenhua Jiujiang power station_Coal	59.3	1.6	1.6	6.3	9.6	1
CHN_Shenhua Yuanyang Lake power station_Coal	40.1	2.3	0.8	19.3	22.4	1
CHN_Tianyuan Shandong power station_Coal	104.9	3.1	0.6	16.6	20.3	1
CHN_Tongmei Yongji power station_Coal	14	0.4	0.2	3.8	4.4	1
CHN_Weinan Factory power station_Coal	68.3	3.5	1.2	6.5	11.2	1
CHN_Weiqiao Huji, 1-4 power station_Coal	29.1	1.4	0.4	8.7	10.5	2
CHN_Weiqiao Zouping-1, 3, 6 power station_Coal	108.9	4.8	2.4	5.1	12.3	1
CHN_Weiqiao Zouping-7 power station_Coal	55.2	1.6	0.2	6.2	8.1	3
CHN_Xinjiang Guanghui power station_Coal	19.6	0.8	1	30.6	32.5	1
CHN_Xinjiang Qiya Smelter power station_Coal	8	0.4	0.1	13.7	14.1	1
CHN_Zhongtian Hechuang Ordos power station_Coal	31.3	1.2	0.2	3.6	5.1	2
DZA_Koudiet Eddraouch_Gas	26.7	1.8	1	18.9	21.6	1
EGY_Sidi Krir_Gas	42	3.1	3.1	9.1	15.3	1
EGY_Suez Gulf_Gas	38.8	1.5	0.4	21.2	23	1
GRC_Ptolemais_Coal	8.9	0.5	0.1	4.5	5.1	1
IDN_PLTU Paiton I Unit 7 & 8_Coal	59.7	2.2	0.6	27.5	30.2	1
IND_MANGLAM CEMENT_Coal	49.7	3.4	2.1	10.6	16	1
IND_MUNDRA TPP_Coal	28.5	0.9	0.2	0.2	1.3	1
IND_NIGRI_Coal	22.8	1.1	0.5	15.1	16.6	1
IND_R_GUNDEM - B, STPS _Coal	29.6	1.5	0.7	5.4	7.7	2
IND_RAS CEMENT PLANT_Coal	21.9	0.7	0	3.8	4.5	1
IND_SASAN UMPP_Coal	45.6	1.9	0.2	13.6	15.7	4
IND_SEIONI TPP_Coal	5.8	0.3	0.3	1.5	2.1	2
IND_SURATGARH_Coal	20.3	0.6	0	11.4	12.1	1
IND_TALCHER STPS_Coal	68	1.4	0.2	15.4	17	1
IRN_Neishabour_Gas	22.6	1.2	0.2	9.9	11.3	1
IRN_Shahid Mofateh_Oil	8.7	0.2	0.1	7	7.3	1
IRN_Shazand_Oil	18.6	0.8	0	6.1	6.9	1
KAZ_Atyrau_Gas	13.1	0.6	1.1	0.6	2.4	1
KAZ_Ekibastuz-1 power station_Coal	65.3	1.6	2.7	15.8	20.1	1
POL_Bełchatów_Coal	109	2.8	1.5	11.5	15.8	1
POL_Kozienice69, II_Coal	30.4	1.1	0.2	3.9	5.2	1
TUR_Afşin Elbistan Termik Santrali_Coal	49.2	1.6	0.3	16.1	18	3
TUR_Soma power station_Coal	45.9	2.3	1.2	4.9	8.4	4
USA_Cardinal_Coal	18.6	0.8	0.6	2.9	4.3	1
USA_Colstrip_Coal	56.7	2.1	0.6	24.9	27.6	1
USA_Cumberland (TN)_Coal	13.8	1	0.3	2.9	4.1	1
USA_Fayette Power Project_Coal	23.6	1.3	0	5.9	7.2	1
USA_Gibson_Coal	20.7	0.8	0	1.7	2.5	1
USA_Hunter_Coal	14.7	0.8	0.2	1.9	2.8	1
USA_James H Miller Jr_Coal	41.7	1.7	1	8.1	10.8	1
USA_Jeffrey Energy Center_Coal	29.3	0.9	0.2	6	7.2	3
USA_Labadie_Coal	34.6	2.6	1	7.9	11.5	1
USA_Laramie River Station_Coal	34.5	1.5	0.2	29.6	31.3	1
USA_Oak Grove (TX)_Coal	41.7	3	1	5.8	9.8	1
USA_Parish, Carbon-Capture, Brazos Energy_CoalGas	28.6	2.1	1	4.7	7.8	1
USA_Prairie State Generating Station_Coal	55.4	2.3	0	4.3	6.6	1
USA_Red Hawk_Gas	8.3	0.4	0.1	5.2	5.7	1
USA_Sooner_Coal	16.5	0.7	0.4	4.3	5.4	2
USA_Transalta Centralia Generation_Coal	46.1	3.4	1.3	4.2	8.9	2
VNM_Vinh Tan 2_Coal	36.1	0.9	2	0.8	3.7	1
ZAF_Arnot power station_Coal	29.9	1.4	0.1	14.6	16.1	1
ZAF_Duvha power station_Coal	49.6	2.2	0.4	29.2	31.8	1
ZAF_Kendal power station_Coal	16.6	1.3	0.6	1.7	3.6	1
ZAF_Lethabo power station_Coal	27.6	0.5	0.6	8	9	1
ZAF_Matimba power station_Coal	89.1	3.9	3.5	8.9	16.3	1
